# Supplementary material
Source: Royal Society of Chemistry journal article supplement (doi:10.1039/d6cp00353b)
Supplement: d6cp00353b1.pdf [file d6cp00353b1.pdf]

## Supporting Information: Impact of Anion Mixing on Li<sup>+</sup> Coordination and Transport Properties in Pyrrolidinium-Based Ionic Liquid Electrolytes

Nicole Abdou,<sup>a†\*</sup> Quan Wu,<sup>b‡</sup> Lars Evenäs,<sup>a</sup> Anna Martinelli,<sup>a</sup> and Aleksandar Matic<sup>b\*</sup>

**Table S1** Viscosity and density values, collected at different temperatures, for all ionic liquid electrolytes. The viscosity values have an uncertainty of  $\pm 0.5\%$  and the density values have an uncertainty of  $\pm 0.0001 \text{ g/cm}^3$ .

| Sample                                                          | T (K) | Viscosity (mPa·s) | Density (g/cm <sup>3</sup> ) |
|-----------------------------------------------------------------|-------|-------------------|------------------------------|
| Pyr <sub>14</sub> FSI                                           | 293   | 61.11             | 1.31                         |
|                                                                 | 303   | 42.57             | 1.30                         |
|                                                                 | 313   | 31.13             | 1.29                         |
|                                                                 | 323   | 23.44             | 1.29                         |
|                                                                 | 333   | 18.27             | 1.28                         |
|                                                                 | 343   | 14.82             | 1.27                         |
|                                                                 | 353   | 12.05             | 1.26                         |
| (LiFSI) <sub>0.2</sub> (Pyr <sub>14</sub> FSI) <sub>0.8</sub>   | 293   | 108.60            | 1.37                         |
|                                                                 | 303   | 70.64             | 1.36                         |
|                                                                 | 313   | 49.49             | 1.35                         |
|                                                                 | 323   | 35.85             | 1.35                         |
|                                                                 | 333   | 26.99             | 1.34                         |
|                                                                 | 343   | 21.02             | 1.33                         |
|                                                                 | 353   | 16.87             | 1.32                         |
| (LiTFSI) <sub>0.2</sub> (Pyr <sub>14</sub> FSI) <sub>0.8</sub>  | 293   | 138.44            | 1.39                         |
|                                                                 | 303   | 88.97             | 1.38                         |
|                                                                 | 313   | 60.45             | 1.37                         |
|                                                                 | 323   | 43.60             | 1.36                         |
|                                                                 | 333   | 32.32             | 1.35                         |
|                                                                 | 343   | 24.83             | 1.35                         |
|                                                                 | 353   | 19.54             | 1.33                         |
| Pyr <sub>14</sub> TFSI                                          | 293   | 96.17             | 1.40                         |
|                                                                 | 303   | 60.32             | 1.39                         |
|                                                                 | 313   | 40.71             | 1.38                         |
|                                                                 | 323   | 28.82             | 1.37                         |
|                                                                 | 333   | 21.26             | 1.36                         |
|                                                                 | 343   | 16.09             | 1.35                         |
|                                                                 | 353   | 12.35             | 1.35                         |
| (LiTFSI) <sub>0.2</sub> (Pyr <sub>14</sub> TFSI) <sub>0.8</sub> | 293   | 369.75            | 1.46                         |
|                                                                 | 303   | 195.66            | 1.45                         |
|                                                                 | 313   | 113.85            | 1.44                         |
|                                                                 | 323   | 71.27             | 1.43                         |
|                                                                 | 333   | 47.62             | 1.42                         |
|                                                                 | 343   | 33.94             | 1.41                         |
|                                                                 | 353   | 24.90             | 1.40                         |
| (LiFSI) <sub>0.2</sub> (Pyr <sub>14</sub> TFSI) <sub>0.8</sub>  | 293   | 279.18            | 1.44                         |
|                                                                 | 303   | 155.76            | 1.43                         |
|                                                                 | 313   | 94.20             | 1.43                         |
|                                                                 | 323   | 61.16             | 1.42                         |
|                                                                 | 333   | 41.98             | 1.41                         |
|                                                                 | 343   | 31.42             | 1.40                         |
|                                                                 | 353   | 22.93             | 1.39                         |

<sup>a</sup> Department of Chemistry and Chemical Engineering, Chalmers University of Technology, SE-412 96 Gothenburg, Sweden. E-mail: nicole.abdou@chalmers.se

<sup>b</sup> Department of Physics, Chalmers University of Technology, SE-412 96 Gothenburg, Sweden. E-mail: matic@chalmers.se

<sup>†</sup> These authors contributed equally to this work.

**Table S2** Ionic conductivity values in S/cm, for all ionic liquid electrolytes.

| T (K) | Pyr <sub>14</sub> FSI | (LiFSI) <sub>0.2</sub> (Pyr <sub>14</sub> FSI) <sub>0.8</sub> | (LiTFSI) <sub>0.2</sub> (Pyr <sub>14</sub> FSI) <sub>0.8</sub> | Pyr <sub>14</sub> TFSI | (LiTFSI) <sub>0.2</sub> (Pyr <sub>14</sub> TFSI) <sub>0.8</sub> | (LiFSI) <sub>0.2</sub> (Pyr <sub>14</sub> TFSI) <sub>0.8</sub> |
|-------|-----------------------|---------------------------------------------------------------|----------------------------------------------------------------|------------------------|-----------------------------------------------------------------|----------------------------------------------------------------|
| 193   | –                     | 6.59e-09                                                      | –                                                              | –                      | –                                                               | –                                                              |
| 203   | –                     | 1.65e-07                                                      | –                                                              | –                      | –                                                               | 3.39e-10                                                       |
| 213   | –                     | 1.71e-06                                                      | –                                                              | –                      | –                                                               | 1.44e-08                                                       |
| 223   | –                     | 9.50e-06                                                      | 3.64e-06                                                       | –                      | –                                                               | 2.95e-07                                                       |
| 233   | –                     | 3.82e-05                                                      | 1.61e-05                                                       | –                      | –                                                               | 5.44e-07                                                       |
| 243   | –                     | 1.15e-04                                                      | 5.49e-05                                                       | –                      | 1.22e-08                                                        | 7.84e-06                                                       |
| 253   | –                     | 2.78e-04                                                      | 1.48e-04                                                       | –                      | 1.57e-07                                                        | 2.45e-05                                                       |
| 263   | 1.23e-03              | 5.80e-04                                                      | 3.29e-04                                                       | –                      | 5.17e-05                                                        | 6.99e-05                                                       |
| 273   | 2.04e-03              | 1.06e-03                                                      | 6.38e-04                                                       | 7.67e-04               | 9.90e-05                                                        | 1.71e-04                                                       |
| 283   | 3.09e-03              | 1.76e-03                                                      | 1.10e-03                                                       | 1.39e-03               | 2.20e-04                                                        | 3.84e-04                                                       |
| 293   | 4.48e-03              | 2.72e-03                                                      | 1.77e-03                                                       | 2.29e-03               | 5.93e-04                                                        | 7.01e-04                                                       |
| 298   | 5.36e-03              | 3.32e-03                                                      | 2.20e-03                                                       | 2.88e-03               | –                                                               | –                                                              |
| 303   | 6.26e-03              | 3.98e-03                                                      | 2.66e-03                                                       | 3.53e-04               | 1.05e-03                                                        | 1.17e-03                                                       |
| 313   | 8.23e-03              | 5.47e-03                                                      | 3.75e-03                                                       | 4.99e-03               | 1.70e-03                                                        | 1.81e-03                                                       |
| 323   | 1.04e-03              | 7.30e-03                                                      | 5.10e-03                                                       | 6.84e-03               | 2.56e-03                                                        | 2.64e-03                                                       |
| 328   | 1.18e-03              | 8.35e-03                                                      | 5.89e-03                                                       | 7.95e-03               | –                                                               | –                                                              |
| 333   | 1.31e-03              | 9.45e-03                                                      | 6.71e-03                                                       | 9.07e-03               | 3.63e-03                                                        | 3.66e-03                                                       |
| 343   | 1.58e-02              | 1.18e-02                                                      | 8.45e-03                                                       | 1.14e-02               | 4.93e-03                                                        | 4.88e-03                                                       |
| 353   | 1.89e-02              | 1.45e-02                                                      | 1.05e-02                                                       | 1.42e-02               | 6.45e-03                                                        | 6.31e-03                                                       |
| 363   | 2.19e-02              | 1.73e-02                                                      | 1.27e-02                                                       | 1.72e-02               | 8.12e-03                                                        | 7.94e-03                                                       |
| 373   | 2.53e-02              | 2.05e-02                                                      | 1.15e-02                                                       | 2.02e-02               | 1.01e-02                                                        | 9.74e-03                                                       |

**Table S3** Parameters from the linear fit of the Walden plots: the slope  $\alpha$  and the intersection point  $\log(C)$ .

| Sample                                                          | $\alpha$   | $\log(C)$    |
|-----------------------------------------------------------------|------------|--------------|
| Pyr <sub>14</sub> FSI                                           | 0.90±0.005 | -0.149±0.003 |
| (LiFSI) <sub>0.2</sub> (Pyr <sub>14</sub> FSI) <sub>0.8</sub>   | 0.92±0.003 | -0.202±0.001 |
| (LiTFSI) <sub>0.2</sub> (Pyr <sub>14</sub> FSI) <sub>0.8</sub>  | 0.93±0.003 | -0.266±0.001 |
| Pyr <sub>14</sub> TFSI                                          | 0.91±0.007 | -0.172±0.004 |
| (LiTFSI) <sub>0.2</sub> (Pyr <sub>14</sub> TFSI) <sub>0.8</sub> | 0.90±0.002 | -0.282±0.001 |
| (LiFSI) <sub>0.2</sub> (Pyr <sub>14</sub> TFSI) <sub>0.8</sub>  | 0.90±0.006 | -0.343±0.002 |

The apparent Li<sup>+</sup> transference number was calculated as follow:

$$t_{\text{Li}^+} = \frac{D_{\text{Li}^+} \cdot x_{\text{Li}^+}}{D_{\text{Li}^+} \cdot x_{\text{Li}^+} + D_{\text{Pyr}_{14}} \cdot x_{\text{Pyr}_{14}} + D_{\text{FSI}} \cdot x_{\text{FSI}} + D_{\text{TFSI}} \cdot x_{\text{TFSI}}} \quad (1)$$

$D_i$  being the apparent self-diffusion coefficient and  $x_i$  being the molar fraction of the  $i$ -th component.

The propagated errors were estimated using the propagation formulas below:

$$\sigma_{\Lambda} = \Lambda \cdot \sqrt{\left(\frac{\sigma_{\sigma_{\text{dc}}}}{\sigma_{\text{dc}}}\right)^2 + \left(\frac{\sigma_{\rho}}{\rho}\right)^2} \quad (2)$$

$$\sigma_{\Lambda_{\text{NE}}} = \frac{F^2}{R \cdot T} \sqrt{\sum_i (x_i \cdot \sigma_{D_i})^2} \quad (3)$$

$$\sigma_{\text{ionicity}} = \text{ionicity} \cdot \sqrt{\left(\frac{\sigma_{\sigma_{\text{dc}}}}{\sigma_{\text{dc}}}\right)^2 + \left(\frac{\sigma_{\rho}}{\rho}\right)^2 + \left(\frac{\sqrt{\sum_i (x_i \cdot \sigma_{D_i})^2}}{\sum_i (x_i \cdot D_i)}\right)^2} \quad (4)$$

**Table S4**  $^1\text{H}$ ,  $^{19}\text{F}$  and  $^7\text{Li}$  self-diffusion coefficient values for all electrolyte samples in the temperature range 298 K - 353 K. The errors are estimated from the fitting.

| Sample                                                          | T (K) | $D_{\text{Pyr}_{14}}$ ( $10^{-11}$ m <sup>2</sup> /s) | $D_{\text{FSI}}$ ( $10^{-11}$ m <sup>2</sup> /s) | $D_{\text{TFSI}}$ ( $10^{-11}$ m <sup>2</sup> /s) | $D_{\text{Li}^+}$ ( $10^{-11}$ m <sup>2</sup> /s) |
|-----------------------------------------------------------------|-------|-------------------------------------------------------|--------------------------------------------------|---------------------------------------------------|---------------------------------------------------|
| Pyr <sub>14</sub> FSI                                           | 298   | 2.39±0.005                                            | 3.02±0.007                                       | n/a                                               | n/a                                               |
|                                                                 | 313   | 4.11±0.011                                            | 4.89±0.006                                       | n/a                                               | n/a                                               |
|                                                                 | 328   | 6.45±0.006                                            | 7.51±0.073                                       | n/a                                               | n/a                                               |
|                                                                 | 343   | 9.61±0.020                                            | 11.10±0.039                                      | n/a                                               | n/a                                               |
|                                                                 | 353   | 12.10±0.033                                           | 14.00±0.032                                      | n/a                                               | n/a                                               |
| (LiFSI) <sub>0.2</sub> (Pyr <sub>14</sub> FSI) <sub>0.8</sub>   | 298   | 1.47±0.002                                            | 1.68±0.004                                       | n/a                                               | 1.24±0.011                                        |
|                                                                 | 313   | 2.69±0.004                                            | 2.91±0.010                                       | n/a                                               | 2.16±0.013                                        |
|                                                                 | 328   | 4.49±0.003                                            | 4.75±0.015                                       | n/a                                               | 3.57±0.008                                        |
|                                                                 | 343   | 6.93±0.009                                            | 7.26±0.025                                       | n/a                                               | 5.52±0.019                                        |
|                                                                 | 353   | 9.07±0.022                                            | 9.23±0.054                                       | n/a                                               | 7.20±0.049                                        |
| (LiTFSI) <sub>0.2</sub> (Pyr <sub>14</sub> FSI) <sub>0.8</sub>  | 298   | 1.29±0.008                                            | 1.37±0.004                                       | 0.99±0.002                                        | 0.96±0.009                                        |
|                                                                 | 313   | 2.40±0.009                                            | 2.47±0.004                                       | 1.83±0.003                                        | 1.76±0.009                                        |
|                                                                 | 328   | 4.13±0.011                                            | 4.18±0.006                                       | 3.17±0.008                                        | 3.00±0.008                                        |
|                                                                 | 343   | 6.56±0.022                                            | 6.58±0.021                                       | 5.07±0.017                                        | 4.71±0.005                                        |
|                                                                 | 353   | 8.54±0.021                                            | 8.55±0.023                                       | 6.66±0.017                                        | 6.18±0.009                                        |
| Pyr <sub>14</sub> TFSI                                          | 298   | 1.75±0.009                                            | n/a                                              | 1.47±0.004                                        | n/a                                               |
|                                                                 | 313   | 3.28±0.007                                            | n/a                                              | 2.80±0.007                                        | n/a                                               |
|                                                                 | 328   | 5.52±0.020                                            | n/a                                              | 4.78±0.009                                        | n/a                                               |
|                                                                 | 343   | 8.58±0.061                                            | n/a                                              | 7.46±0.013                                        | n/a                                               |
|                                                                 | 353   | 11.10±0.104                                           | n/a                                              | 9.70±0.024                                        | n/a                                               |
| (LiTFSI) <sub>0.2</sub> (Pyr <sub>14</sub> TFSI) <sub>0.8</sub> | 298   | 0.59±0.005                                            | n/a                                              | 0.38±0.001                                        | 0.36±0.028                                        |
|                                                                 | 313   | 1.29±0.008                                            | n/a                                              | 0.88±0.003                                        | 0.68±0.038                                        |
|                                                                 | 328   | 2.67±0.010                                            | n/a                                              | 1.75±0.002                                        | 1.28±                                             |
|                                                                 | 343   | 4.79±0.043                                            | n/a                                              | 3.08±0.004                                        | 2.18±0.014                                        |
|                                                                 | 353   | 6.72±0.014                                            | n/a                                              | 4.28±0.010                                        | 3.10±0.027                                        |
| (LiFSI) <sub>0.2</sub> (Pyr <sub>14</sub> TFSI) <sub>0.8</sub>  | 298   | 0.68±0.002                                            | 0.66±0.001                                       | 0.49±0.002                                        | 0.47±0.040                                        |
|                                                                 | 313   | 1.43±0.004                                            | 1.40±0.004                                       | 1.07±0.003                                        | 0.81±0.016                                        |
|                                                                 | 328   | 2.84±0.008                                            | 2.60±0.007                                       | 2.06±0.004                                        | 1.51±0.026                                        |
|                                                                 | 343   | 5.01±0.012                                            | 4.38±0.005                                       | 3.52±0.006                                        | 2.52±0.075                                        |
|                                                                 | 353   | 6.91±0.021                                            | 5.94±0.012                                       | 4.80±0.021                                        | 4.14±0.148                                        |

**Table S5** Apparent transference number of the Li<sup>+</sup> (calculated using eq. 1) as a function of temperature for all electrolytes.

| Sample                                                          | T (K) | $t_{\text{Li}^+}$ |
|-----------------------------------------------------------------|-------|-------------------|
| (LiFSI) <sub>0.2</sub> (Pyr <sub>14</sub> FSI) <sub>0.8</sub>   | 298   | 0.0799            |
|                                                                 | 313   | 0.0786            |
|                                                                 | 328   | 0.0788            |
|                                                                 | 343   | 0.0794            |
|                                                                 | 353   | 0.0803            |
| (LiTFSI) <sub>0.2</sub> (Pyr <sub>14</sub> FSI) <sub>0.8</sub>  | 298   | 0.0763            |
|                                                                 | 313   | 0.0689            |
|                                                                 | 328   | 0.0688            |
|                                                                 | 343   | 0.0683            |
|                                                                 | 353   | 0.0689            |
| (LiTFSI) <sub>0.2</sub> (Pyr <sub>14</sub> TFSI) <sub>0.8</sub> | 298   | 0.0777            |
|                                                                 | 313   | 0.0664            |
|                                                                 | 328   | 0.0618            |
|                                                                 | 343   | 0.0593            |
|                                                                 | 353   | 0.0603            |
| (LiFSI) <sub>0.2</sub> (Pyr <sub>14</sub> TFSI) <sub>0.8</sub>  | 298   | 0.0808            |
|                                                                 | 313   | 0.0663            |
|                                                                 | 328   | 0.0637            |
|                                                                 | 343   | 0.0614            |
|                                                                 | 353   | 0.0727            |

**Table S6** Molar conductivities ( $\Lambda$  estimated from impedance measurements and  $\Lambda_{NE}$  calculated from the NMR diffusometry data) and the corresponding ionicity values at different temperatures. The errors were calculated using the propagation formulas described above (eq. 3-5).

| Sample                                                          | T (K) | $\Lambda$ (S·cm <sup>2</sup> /mol) | $\Lambda_{NE}$ (S·cm <sup>2</sup> /mol) | ionicity  |
|-----------------------------------------------------------------|-------|------------------------------------|-----------------------------------------|-----------|
| Pyr <sub>14</sub> FSI                                           | 293   | 1.10±0.16                          |                                         |           |
|                                                                 | 298   |                                    | 2.033±0.003                             | 0.64      |
|                                                                 | 303   | 1.55±0.23                          |                                         |           |
|                                                                 | 313   | 2.05±0.31                          | 3.219±0.005                             | 0.64±0.09 |
|                                                                 | 323   | 2.61±0.39                          |                                         |           |
|                                                                 | 328   |                                    | 4.765±0.025                             | 0.62      |
|                                                                 | 333   | 3.30±0.49                          |                                         |           |
|                                                                 | 343   | 4.01±0.60                          | 6.760±0.014                             | 0.59±0.09 |
|                                                                 | 353   | 4.81±0.72                          | 8.278±0.014                             | 0.58±0.09 |
| (LiFSI) <sub>0.2</sub> (Pyr <sub>14</sub> FSI) <sub>0.8</sub>   | 293   | 0.58±0.09                          |                                         |           |
|                                                                 | 298   |                                    | 1.166±0.002                             | 0.61      |
|                                                                 | 303   | 0.86±0.13                          |                                         |           |
|                                                                 | 313   | 1.19±0.18                          | 1.965±0.004                             | 0.61±0.09 |
|                                                                 | 323   | 1.60±0.24                          |                                         |           |
|                                                                 | 328   |                                    | 3.091±0.005                             | 0.59      |
|                                                                 | 333   | 2.09±0.31                          |                                         |           |
|                                                                 | 343   | 2.62±0.39                          | 4.540±0.008                             | 0.58±0.09 |
|                                                                 | 353   | 3.23±0.48                          | 5.686±0.018                             | 0.57±0.08 |
| (LiTFSI) <sub>0.2</sub> (Pyr <sub>14</sub> FSI) <sub>0.8</sub>  | 293   | 0.40±0.06                          |                                         |           |
|                                                                 | 298   |                                    | 0.946±0.003                             | 0.53      |
|                                                                 | 303   | 0.61±0.09                          |                                         |           |
|                                                                 | 313   | 0.86±0.13                          | 1.650±0.003                             | 0.52±0.08 |
|                                                                 | 323   | 1.18±0.18                          |                                         |           |
|                                                                 | 328   |                                    | 2.691±0.004                             | 0.49      |
|                                                                 | 333   | 1.56±0.23                          |                                         |           |
|                                                                 | 343   | 1.98±0.30                          | 4.070±0.008                             | 0.49±0.07 |
|                                                                 | 353   | 2.47±0.37                          | 5.151±0.008                             | 0.48±0.07 |
| Pyr <sub>14</sub> TFSI                                          | 293   | 0.69±0.10                          |                                         |           |
|                                                                 | 298   |                                    | 1.210±0.004                             | 0.72      |
|                                                                 | 303   | 1.07±0.16                          |                                         |           |
|                                                                 | 313   | 1.52±0.23                          | 2.175±0.004                             | 0.70±0.10 |
|                                                                 | 323   | 2.10±0.32                          |                                         |           |
|                                                                 | 328   |                                    | 3.516±0.007                             | 0.69      |
|                                                                 | 333   | 2.81±0.42                          |                                         |           |
|                                                                 | 343   | 3.57±0.53                          | 5.236±0.020                             | 0.68±0.10 |
|                                                                 | 353   | 4.45±0.67                          | 6.597±0.034                             | 0.67±0.10 |
| (LiTFSI) <sub>0.2</sub> (Pyr <sub>14</sub> TFSI) <sub>0.8</sub> | 293   | 0.16±0.02                          |                                         |           |
|                                                                 | 298   |                                    | 0.348±0.003                             | 0.64      |
|                                                                 | 303   | 0.29±0.04                          |                                         |           |
|                                                                 | 313   | 0.47±0.07                          | 0.7322±0.0038                           | 0.63±0.10 |
|                                                                 | 323   | 0.71±0.11                          |                                         |           |
|                                                                 | 328   |                                    | 1.414±0.003                             | 0.61      |
|                                                                 | 333   | 1.01±0.15                          |                                         |           |
|                                                                 | 343   | 1.38±0.21                          | 2.399±0.011                             | 0.58±0.09 |
|                                                                 | 353   | 1.82±0.27                          | 3.259±0.005                             | 0.56±0.08 |
| (LiFSI) <sub>0.2</sub> (Pyr <sub>14</sub> TFSI) <sub>0.8</sub>  | 293   | 0.18±0.03                          |                                         |           |
|                                                                 | 298   |                                    | 0.437±0.003                             | 0.47      |
|                                                                 | 303   | 0.30±0.05                          |                                         |           |
|                                                                 | 313   | 0.47±0.07                          | 0.873±0.002                             | 0.54±0.08 |
|                                                                 | 323   | 0.70±0.10                          |                                         |           |
|                                                                 | 328   |                                    | 1.619±0.003                             | 0.48      |
|                                                                 | 333   | 0.97±0.15                          |                                         |           |
|                                                                 | 343   | 1.31±0.20                          | 2.678±0.006                             | 0.49±0.07 |
|                                                                 | 353   | 1.70±0.26                          | 3.611±0.012                             | 0.47±0.07 |
